# Supplementary material for: Green-synthesized Matricaria chamomilla silver nanoparticles enhance anticonvulsant and neuroprotective effects through GABAergic and antioxidant pathways in an acute seizure rat model
Source: Royal Society of Chemistry journal article supplement (doi:10.1039/d6ra01236a), 2026-05-05
Supplement: d6ra01236a1.pdf [file d6ra01236a1.pdf]

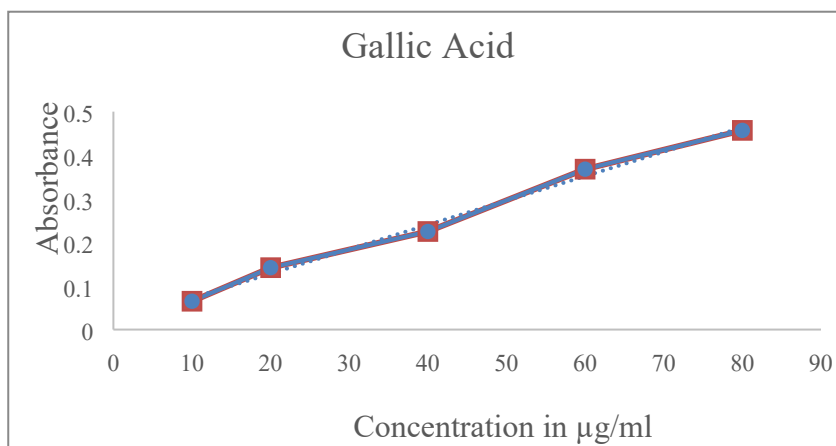

**Supplementary Figure 1:** Standard curve for Gallic acid

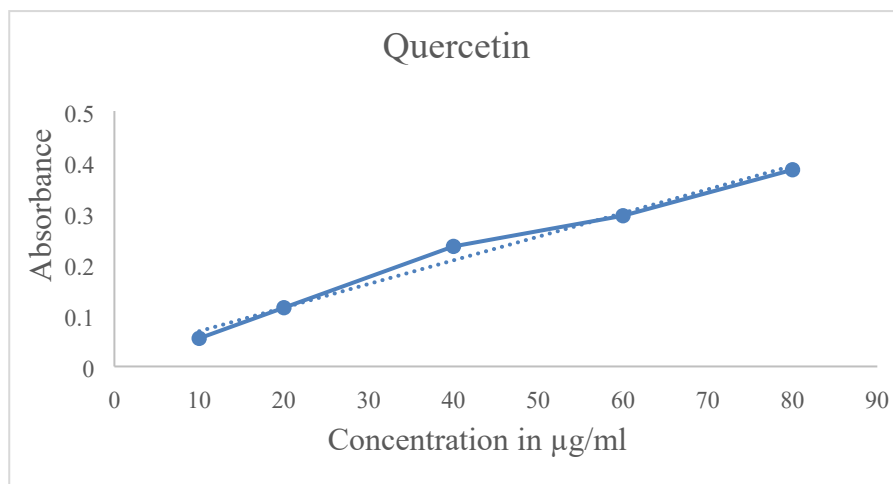

**Supplementary Figure 2:** Standard curve for Quercetin

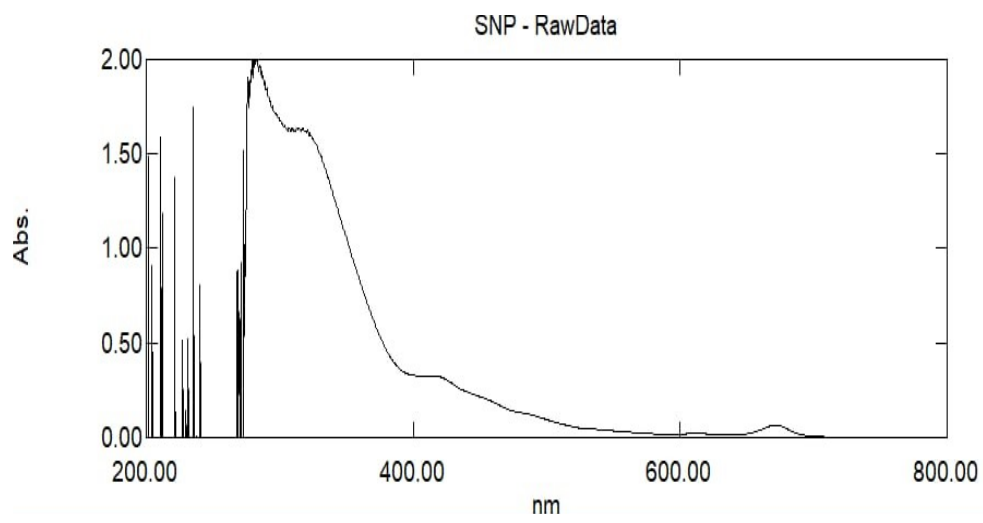

**Supplementary Figure 3:** UV-Visible graph of *Matricaria chamomilla* ethanolic extract.
